# Supplementary material for: Novel Mn4+ doped red phosphors composed of MgAl2O4 and CaAl12O19 phases for light-emitting diodes
Source: Royal Society of Chemistry journal article supplement (doi:10.1039/d0dt00118j), 2020-01-01
Supplement: d0dt00118j1.pdf [file d0dt00118j1.pdf]

# A novel Mn<sup>4+</sup> doped red phosphor composed of MgAl<sub>2</sub>O<sub>4</sub> and CaAl<sub>12</sub>O<sub>19</sub> phases for Light-Emitting Diodes

Yibing Wu<sup>a,b</sup>, Yixi Zhuang<sup>c,\*</sup>, Rong-Jun Xie<sup>c</sup>, Kaibin Ruan<sup>b</sup>, Xinhua Ouyang<sup>a,\*</sup>

**a** *College of Material Engineering, Fujian Agriculture and Forestry University, Fuzhou 350002, P. R. China.*

**b** *College of Mechanical and Electronic Engineering, Fujian Agriculture and Forestry University, Fuzhou, 350002, P. R. China.*

**c** *College of Materials, Xiamen University, Simingnan-Road 422, Xiamen 361005, P. R. China.*

\*Email: [zhuangyixi@xmu.edu.cn](mailto:zhuangyixi@xmu.edu.cn);

[ouyangxh@fafu.edu.cn](mailto:ouyangxh@fafu.edu.cn)

Table S1 Results of EDX measurements (in atom%) for CMA:Mn<sup>4+</sup>

| Element | Theoretical(atom%) | Experimental(atom%) |
|---------|--------------------|---------------------|
| Ca      | 2.17               | 1.39                |
| Mg      | 4.35               | 2.35                |
| Al      | 34.78              | 24.92               |
| O       | 58.70              | 71.27               |

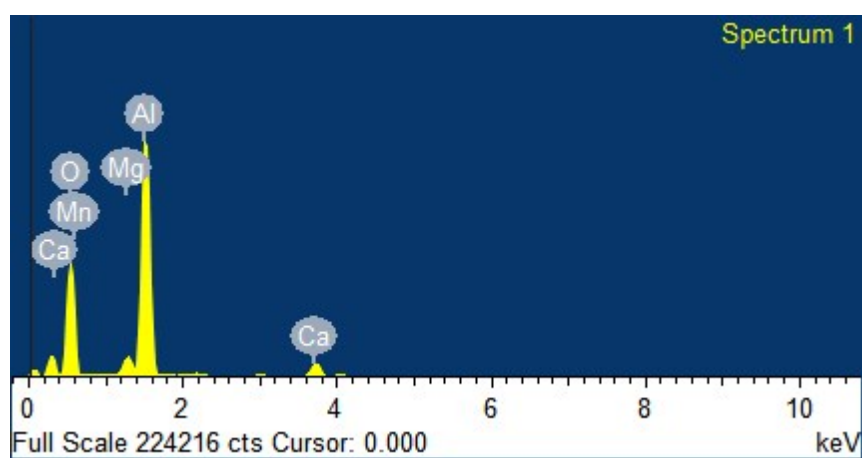

Fig. S1. Exemplary EDX-Spectra of CMA:Mn<sup>4+</sup>

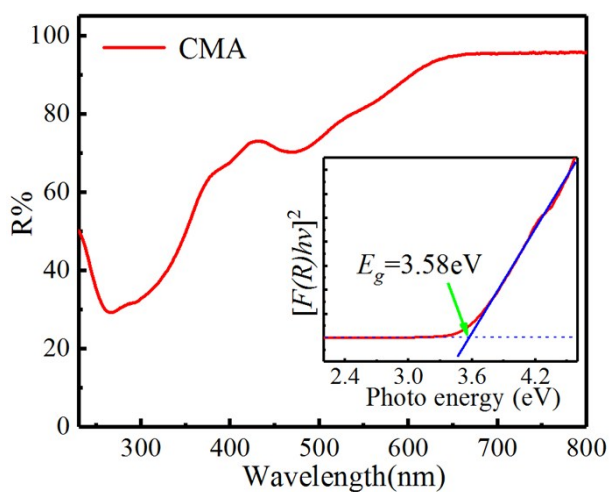

Fig. S2 The diffuse reflectance spectra of CMA:Mn<sup>4+</sup> at room temperature.

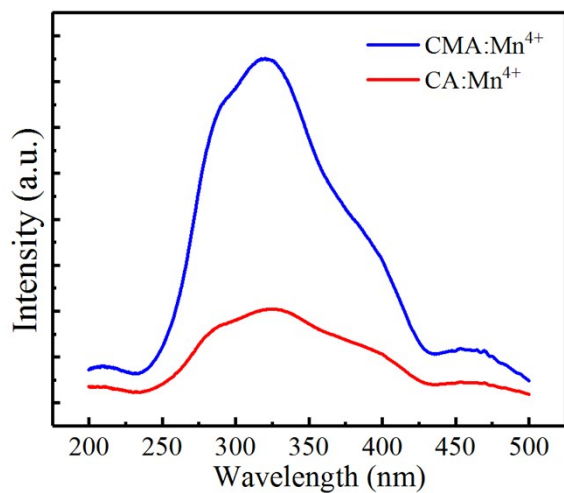

Fig. S3 The excitation spectra of CA:Mn<sup>4+</sup> and CMA:Mn<sup>4+</sup> monitored at 658 nm, respectively.

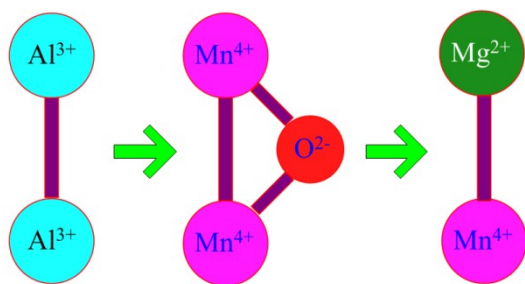

Fig. S4 Schematic illustration of Mn<sup>4+</sup>-Mn<sup>4+</sup> pairs in connection with interstitial O<sup>2-</sup> transformed into isolated Mn<sup>4+</sup> ions with Mg<sup>2+</sup> ions.

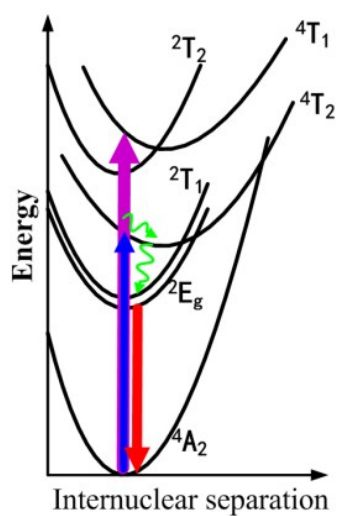

Fig. S5 Configurational coordinate diagram for Mn<sup>4+</sup> ions.
